# Supplementary material for: Evaluation of the formation pathways of cocrystal polymorphs in liquid-assisted syntheses
Source: Royal Society of Chemistry journal article supplement (doi:10.1039/c4ce00472h), 2014-01-01
Supplement: c4ce00472h1.pdf [file c4ce00472h1.pdf]

Supporting Information

## Evaluation of the formation pathways of cocrystal polymorphs in liquid-assisted synthesis

Franziska Fischer,<sup>a,b</sup> Gudrun Scholz,<sup>b</sup> Sigrid Benemann,<sup>a</sup> Klaus Rademann<sup>b</sup> and Franziska Emmerling<sup>a,\*</sup>

<sup>a</sup> BAM Federal Institute for Materials Research and Testing, Richard-Willstaetter-Strasse 11, 12489 Berlin, Germany.  
Fax: 030/8104-1139; Tel: 030/8104-1133

<sup>b</sup> Department of Chemistry, Humboldt-Universität zu Berlin, Brook-Taylor-Str. 2, 12489 Berlin, Germany.

E-mail\*: franziska.emmerling@bam.de

### 1. Solid-state NMR

<sup>1</sup>H MAS NMR spectra were recorded on a Bruker AVANCE 400 spectrometer using a 2.5 mm double-bearing MAS probe (Bruker Biospin) and applying a spinning speed of 20 kHz. The <sup>1</sup>H MAS NMR spectra were recorded with a  $\pi/2$  pulse lengths of 3.7  $\mu$ s, a recycle delay of 5 s and an accumulation number of 256. Existent background signals were suppressed with a phase-cycled depth pulse sequence according to Cory and Ritchey.<sup>40</sup>

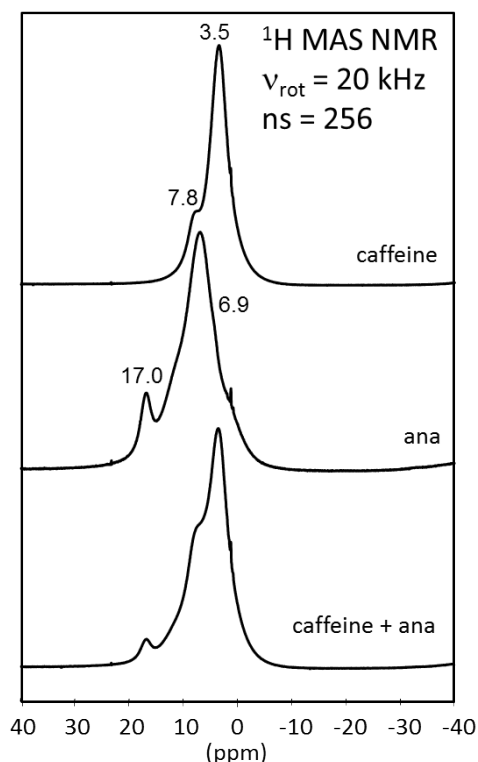

**Fig. S 1** <sup>1</sup>H magic angle spinning (MAS) NMR spectra of caffeine (above), anthranilic acid (ana) and the superimposed spectra of the reactants (below) without the spinning sidebands.

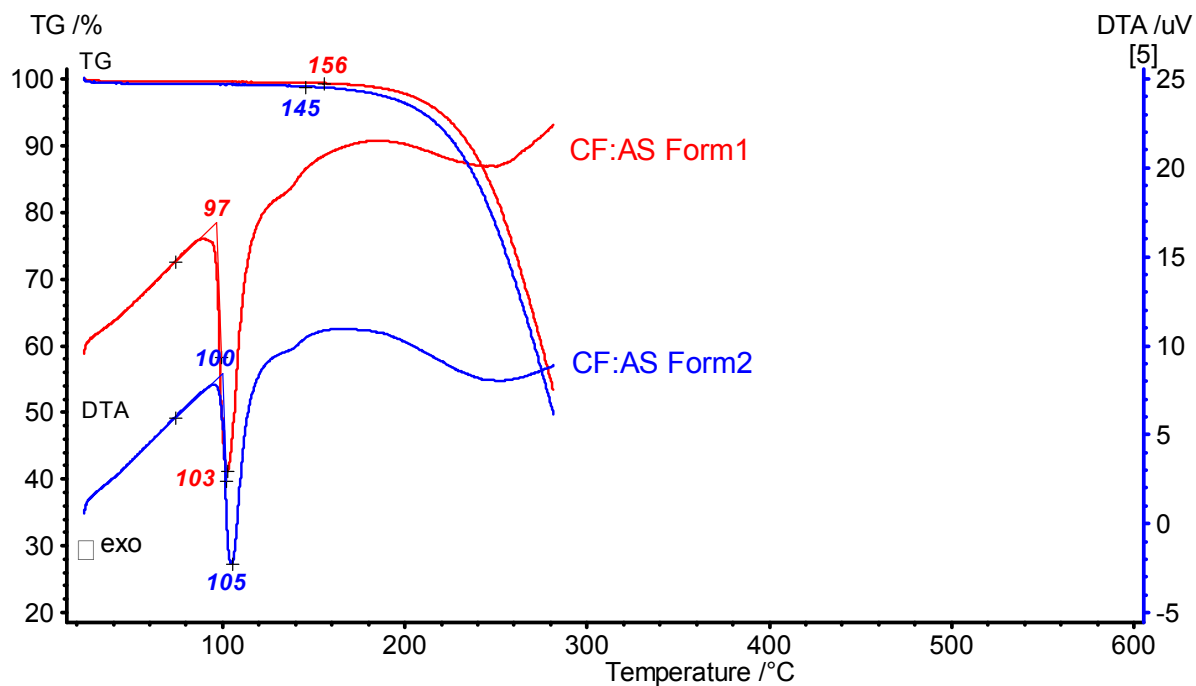

Fig. S 2 DTA/TG measurements of the of cf:ana cocrystal form I (red) and form II (blue).

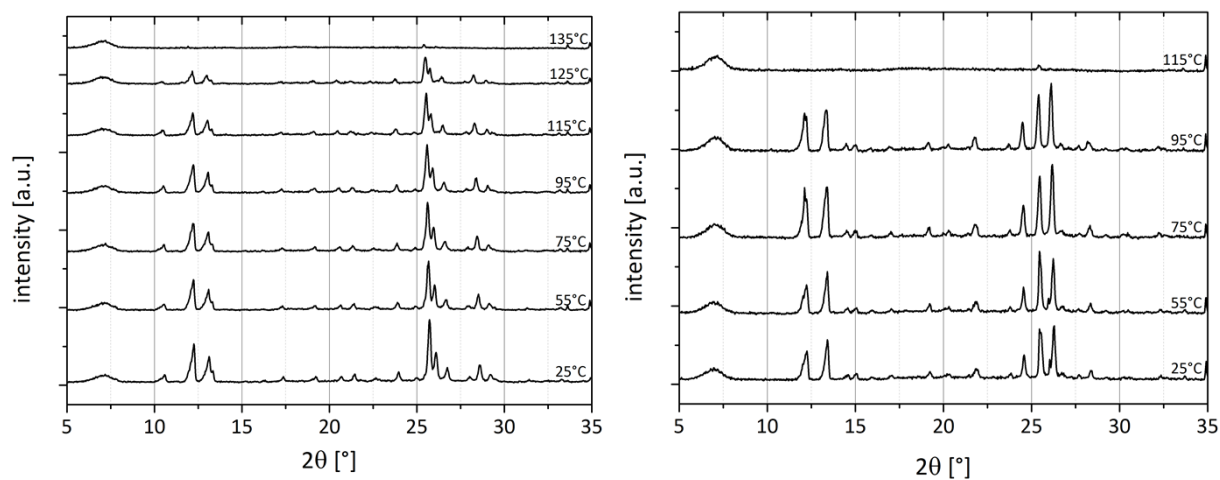

Fig. S 3 Temperature dependent PXRD patterns of the cf:ana cocrystal form I (left) and form II (right). The reflections, which remain in the diffraction pattern of melt are based on the sample holder and the Kapton foil.

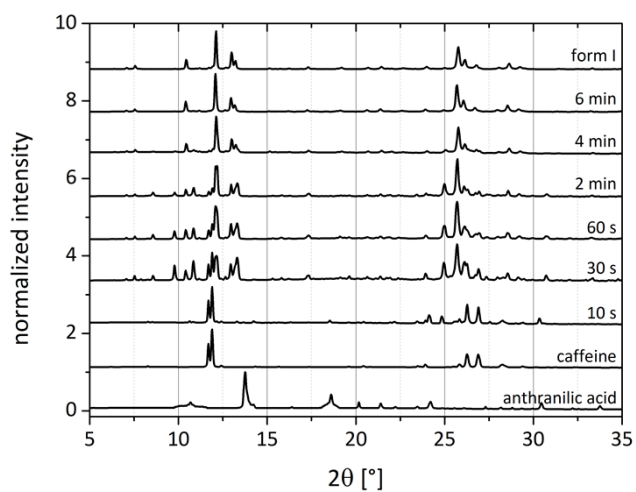

**Fig. S 4** XRD patterns of the cf:ana cocrystal (form I) after different milling time intervals. Dioxane was used in the grinding process.

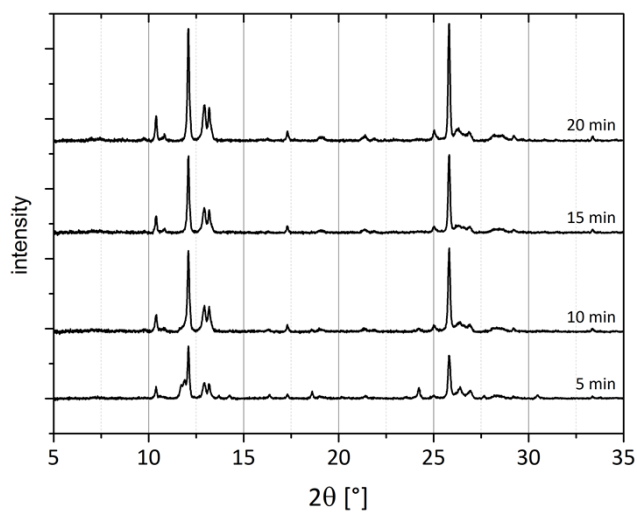

**Fig. S 5** XRD patterns of the cf:ana cocrystal (form I) after different milling time intervals during neat grinding.
